# Supplementary material for: Antithymocyte globulin exposure in CD34+ T-cell–depleted allogeneic hematopoietic cell transplantation
Source: PubMed Central journal article supplement — Blood Adv. 2022 Feb 7;6(3):1054–63. doi: 10.1182/bloodadvances.2021005584 (PMC8945304; doi:10.1182/bloodadvances.2021005584), 2022-02-07
Supplement: advancesADV2021005584-suppl1.pdf [file advancesADV2021005584-suppl1.pdf]

## Supplementary Appendix

### Table of Contents:

|                              |   |
|------------------------------|---|
| Supplementary Figure 1 ..... | 1 |
| Supplementary Figure 2 ..... | 2 |
| Supplementary Figure 3 ..... | 3 |
| Supplementary Figure 4 ..... | 4 |
| Supplementary Figure 5 ..... | 5 |
| Supplementary Table 1 .....  | 6 |
| Supplementary Table 2 .....  | 7 |

**Supplementary 1:** Flowchart of patients analyzed and outcomes assessed for determination of optimal post hematopoietic cell transplantation (HCT) rabbit anti-thymocyte globulin (rATG) exposure

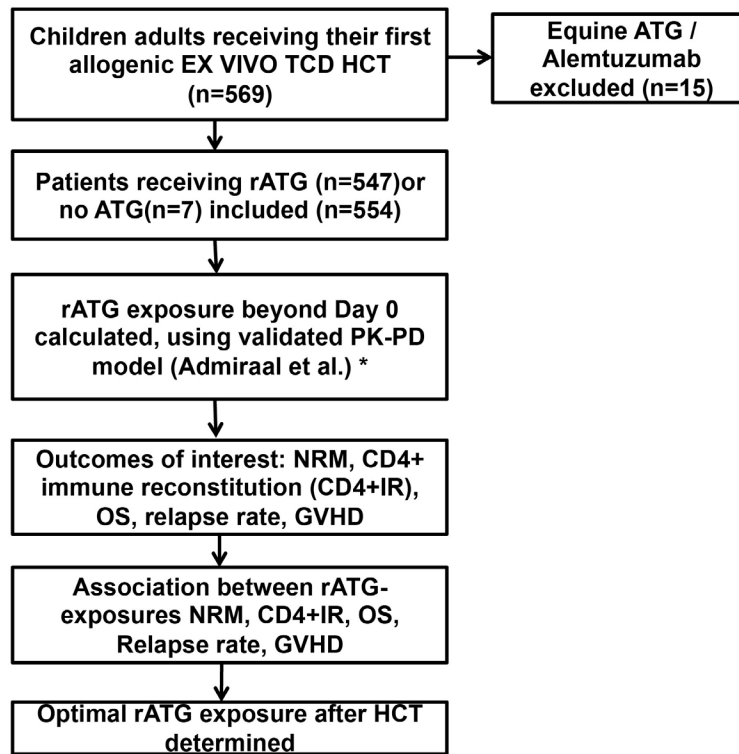

\*Weight, height, age, gender, conditioning regimen, type and date of transplant, 1<sup>st</sup> day of rATG, Dose of rATG, Duration of rATG infusion, and ALC on the 1<sup>st</sup> day of ATG were inputted in validated Pharmacokinetic-pharmacodynamic (PK-PD) model, *Admiraal et al. Lancet Hematology 2017*

rATG: rabbit anti-thymocyte globulin

NRM: Non-relapse mortality

CD4+ IR: CD4+ Immune Reconstitution defined as CD4+ levels twice above 50/uL at two consecutive measures within 100 days

OS: Overall survival

GVHD: Graft versus Host Disease

HCT: Hematopoietic cell Transplantation

**Supplementary Figure 2.** Panel A shows non-relapse mortality (NRM) and different levels of post hematopoietic cell transplantation (HCT) rabbit anti-thymocyte globulin (rATG) exposure in Matched Donor Group (Overall). Panel B shows NRM and different levels of post- HCT rATG exposure in Mismatched Donor group (Overall).

**A**

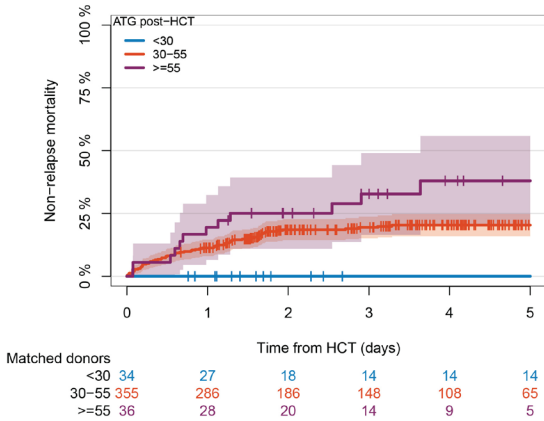

**B**

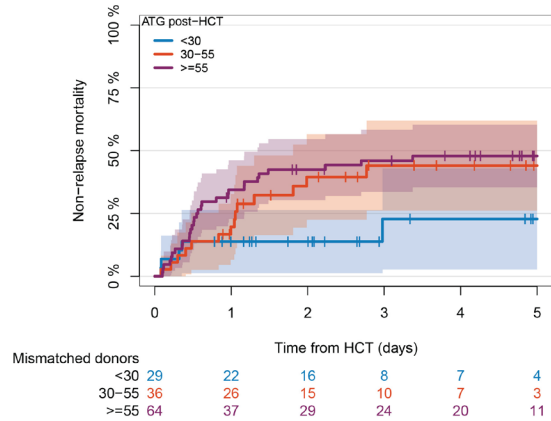

rATG: rabbit anti-thymocyte globulin, NRM: Non-relapse mortality, HCT: Hematopoietic cell Transplantation

**Supplementary Figure 3.** Panel A shows co-relation between different levels of post hematopoietic cell transplantation (HCT) rabbit anti-thymocyte globulin (rATG) exposure and CD4+Immune Reconstitution (CD4+IR) in Matched Donor group (overall), CD4+IR was defined as CD4+ levels twice above 50/uL at two consecutive measures within 100 days. Panel B shows co-relation between different levels of post-HCT rATG exposure and CD4+IR and in Mismatched Donor group (overall). Panel C shows co-relation between CD4+IR and NRM in patients who underwent HCT for malignant disorders.

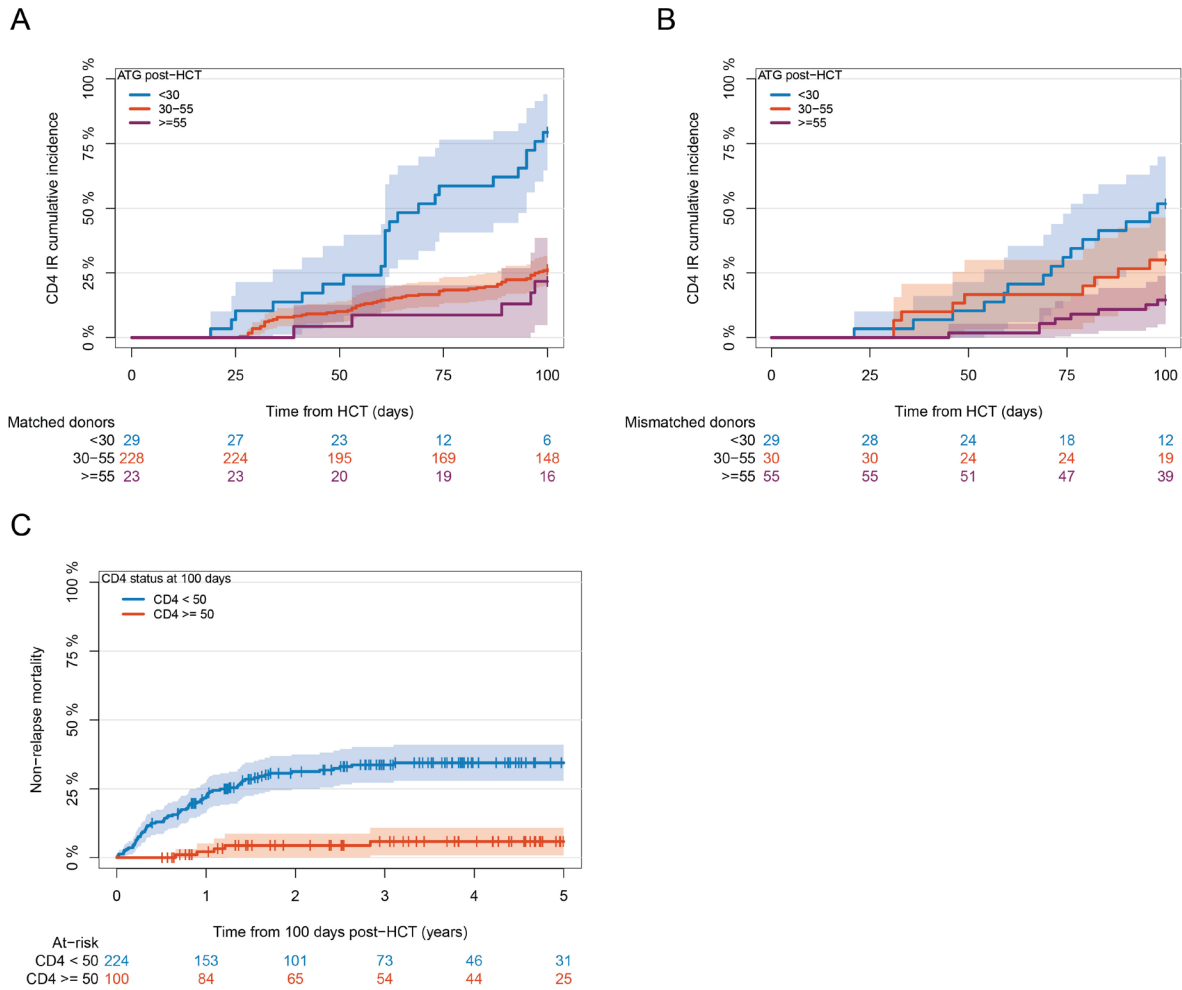

NRM: non-relapse mortality, rATG: rabbit anti-thymocyte globulin, CD4+IR: CD4+Immune Reconstitution, HCT: Hematopoietic cell Transplantation

**Supplementary Figure 4.** Panel A shows co-relation between different levels of post hematopoietic cell transplantation (HCT) rabbit anti-thymocyte globulin (rATG) exposure and Overall Survival (OS) in Matched Donor group (Overall). Panel B shows co-relation between different levels of post-HCT rATG exposure and OS in Mismatched Donor group (Overall)

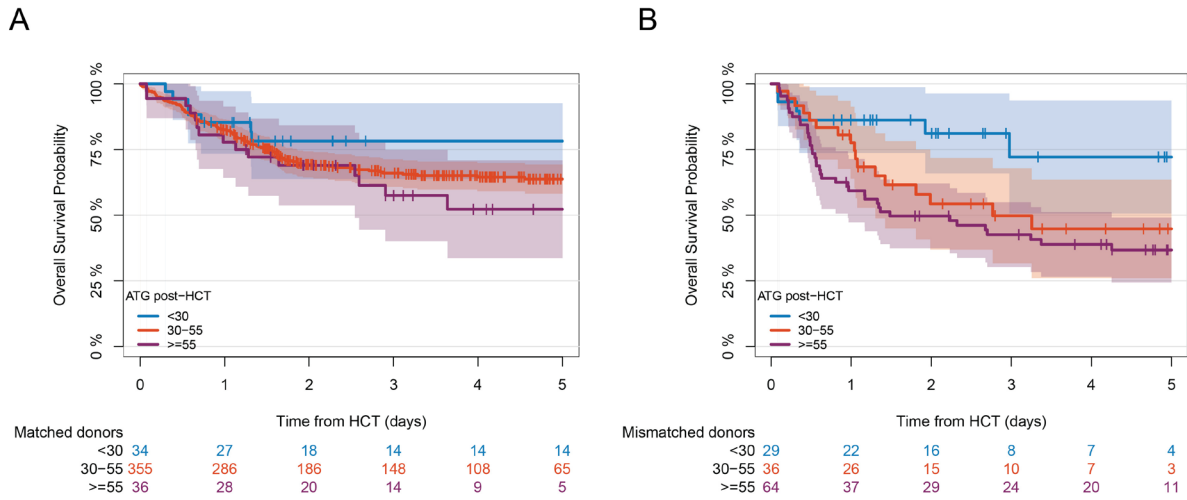

rATG: rabbit anti-thymocyte globulin, OS: Overall survival, HCT: Hematopoietic cell Transplantation

**Supplementary Figure 5.** Panel A shows co-relation between different levels of post hematopoietic cell transplantation (HCT) rabbit anti-thymocyte globulin (rATG) exposure and acute Graft versus Host Disease (GVHD) in Matched Donor group (Overall). Panel B shows co-relation between different levels of post-HCT rATG exposure and GVHD in Mismatched Donor group (Overall)

A

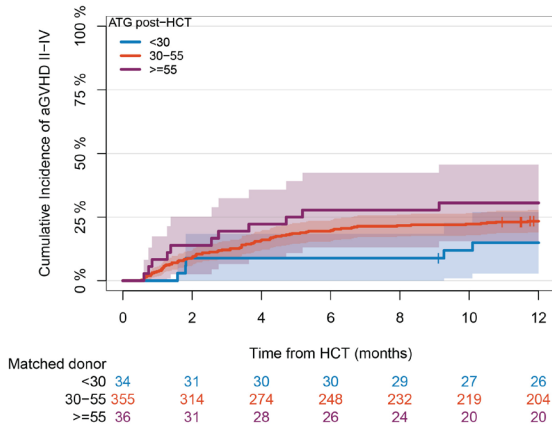

B

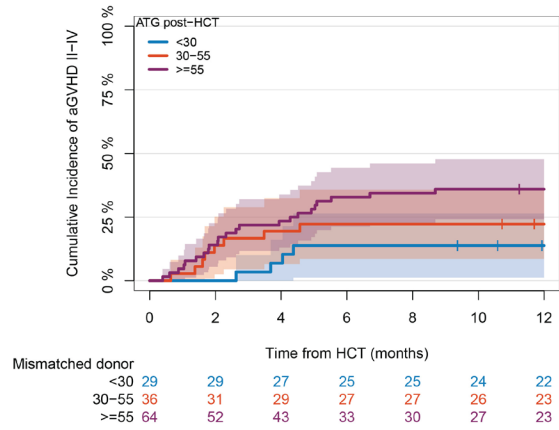

rATG: rabbit anti-thymocyte globulin, GVHD: Graft versus Host Disease, HCT: hematopoietic cell transplantation

**Supplementary Table 1: Multivariable model for prognostic analysis of Overall Survival (OS) variables with  $p < 0.05$  are kept in the final model (with age as adjustment factor); results of the other variables, at the bottom in italic, are results of the variables added one by one in the final model.**

| Characteristic                   | HR <sup>1</sup> | 95% CI <sup>1</sup> | p-value |
|----------------------------------|-----------------|---------------------|---------|
| <b>Age (categories)</b>          |                 |                     | 0.10    |
| <20                              | Ref.            |                     |         |
| [20-40]                          | 0.88            | 0.43, 1.82          |         |
| [40-60]                          | 1.03            | 0.43, 2.47          |         |
| >=60                             | 1.46            | 0.61, 3.50          |         |
| <b>Donor type</b>                |                 |                     | <0.001* |
| MRD                              | Ref.            |                     |         |
| MUD                              | 1.04            | 0.73, 1.47          |         |
| MMD                              | 2.19            | 1.49, 3.22          |         |
| <b>CMV match</b>                 |                 |                     | 0.01*   |
| R-/D-                            | Ref.            |                     |         |
| R-/D+                            | 1.24            | 0.75, 2.07          |         |
| R+/D-                            | 1.26            | 0.83, 1.92          |         |
| R+/D+                            | 1.78            | 1.24, 2.54          |         |
| <b>HCT-CI</b>                    |                 |                     | <0.001* |
| 0-1                              | Ref.            |                     |         |
| 2-3                              | 1.80            | 1.29, 2.53          |         |
| 4-10                             | 2.48            | 1.71, 3.61          |         |
| <b>ATG exposure (categories)</b> |                 |                     | 0.11    |
| < 30                             | Ref.            |                     |         |
| [30-55]                          | 1.29            | 0.67, 2.49          |         |
| ≥55                              | 1.83            | 0.92, 3.63          |         |
| <b>Malignant</b>                 |                 |                     | 0.12    |
| <i>Malignant</i>                 | Ref.            |                     |         |
| <i>Non Malignant</i>             | 0.53            | 0.23, 1.23          |         |

<sup>1</sup>HR = Hazard Ratio, CI = Confidence Interval

ATG: Rabbit Antithymocyte Globulin, CMV: Cytomegalovirus, R: Recipient, D: Donor, MMD: Mismatched Donor, MRD: Matched Related Donor, MUD: Matched Unrelated Donor, HCT- CI: Hematopoietic Cell Transplantation Co-Morbidity Index

\*Indicates significant

**Supplementary Table 2: Multivariable model for prognostic analysis of time to relapse in patients with malignant disorders**

| Characteristic                        | HR <sup>1</sup> | 95% CI <sup>1</sup> | p-value |
|---------------------------------------|-----------------|---------------------|---------|
| <b>Age (categories)</b>               |                 |                     | <0.001* |
| <20                                   | Ref.            |                     |         |
| [20-40]                               | 0.16            | 0.04, 0.63          |         |
| [40-60]                               | 0.50            | 0.12, 2.04          |         |
| >=60                                  | 0.56            | 0.13, 2.43          |         |
| <b>Gender</b>                         |                 |                     | 0.03*   |
| Female                                | Ref.            |                     |         |
| Male                                  | 1.61            | 1.04, 2.50          |         |
| <b>TBI based Conditioning Regimen</b> |                 |                     | 0.004*  |
| No                                    | Ref.            |                     |         |
| Yes                                   | 2.16            | 1.27, 3.65          |         |
| <b>DRI</b>                            |                 |                     | <0.001* |
| High                                  | Ref.            |                     |         |
| Intermediate                          | 0.28            | 0.17, 0.45          |         |
| Low                                   | 0.25            | 0.11, 0.57          |         |

<sup>1</sup>HR = Hazard Ratio, CI = Confidence Interval

TBI: Total Body Irradiation, DRI: Disease Related Index

\*Indicates significant
